# Supplementary material for: Fabrication of efficient and stable perovskite solar cells in open air through adopting a dye interlayer
Source: Royal Society of Chemistry journal article supplement (doi:10.1039/d2se00951j), 2022-01-01
Supplement: d2se00951j1.pdf [file d2se00951j1.pdf]

## Supporting Information

### **Efficient and stable perovskite solar cells fabrication in open air through adopting a dye interlayer**

Ningxia Gu, Ye Feng, Lixin Song\*, Pengyun Zhang, Pingfan Du, Lei Ning, Zeyuan Sun, Xiang Chen, Hua Jiang\*, Jie Xiong\*

College of Textile Science and Engineering, Zhejiang Sci-Tech University, Hangzhou, 310018, China.

\* Corresponding Authors: [lsxong12@zstu.edu.cn](mailto:lsxong12@zstu.edu.cn) (LX Song), [jh@zstu.edu.cn](mailto:jh@zstu.edu.cn) (H Jiang)

and [jxiong@zstu.edu.cn](mailto:jxiong@zstu.edu.cn) (J Xiong)

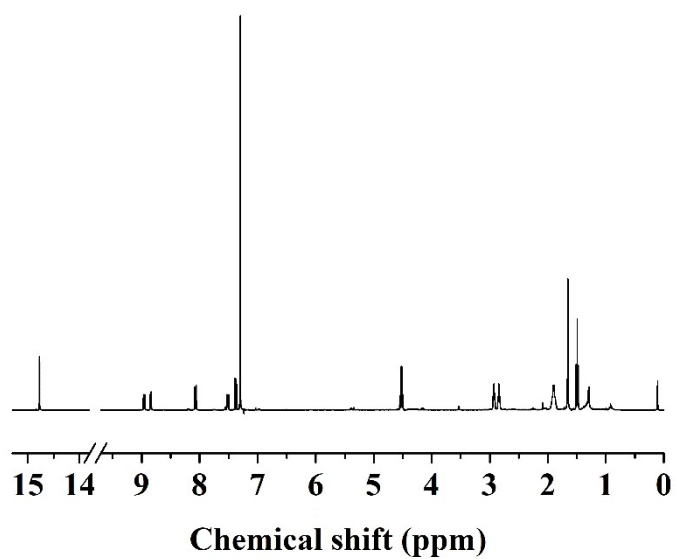

**Figure S1.**  $^1\text{H}$  NMR spectrum of HQTh-EC.

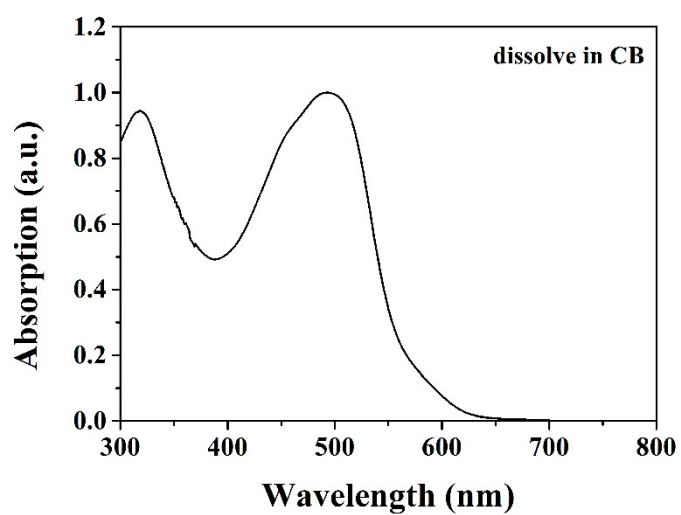

**Figure S2.** The absorption spectrum of HQTh-EC solution dissolved in chlorobenzene.

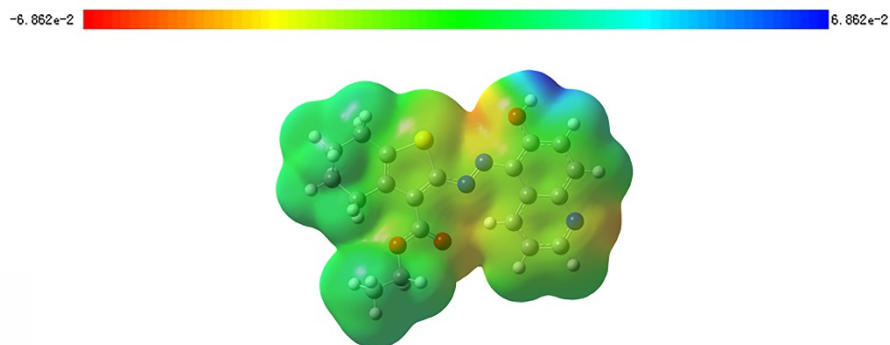

**Figure S3.** The electrostatic potential of HQTh-EC.

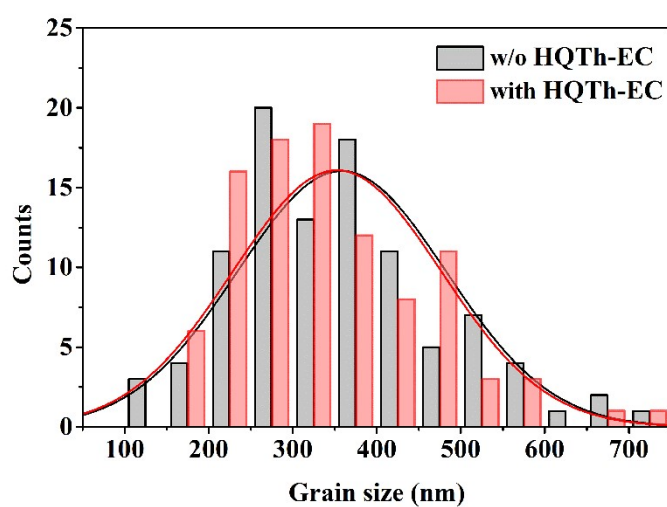

**Figure S4.** The statistical histograms of perovskite grain size (without and with HQTh-EC).

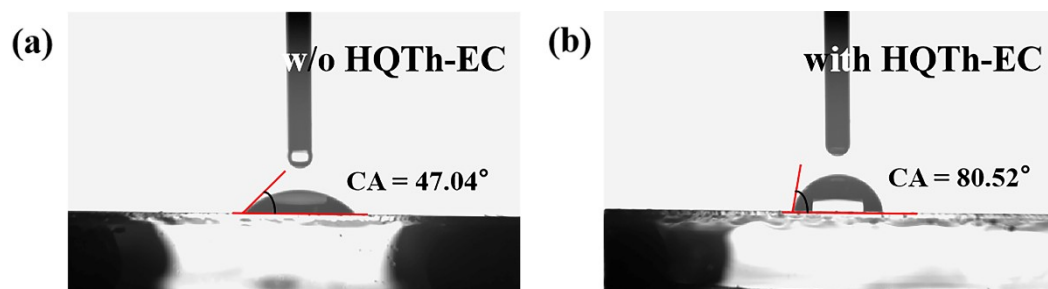

**Figure S5.** The water-contact-angle images of the perovskite films without and with HQTh-EC.

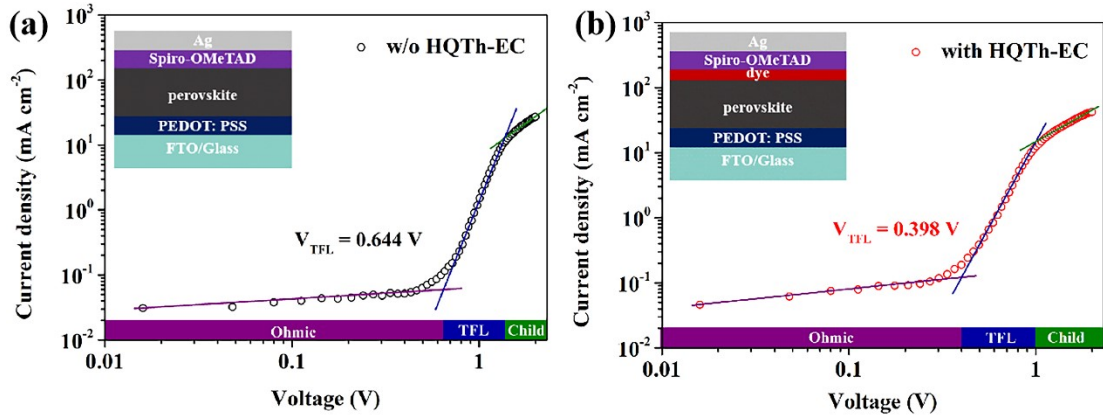

**Figure S6.** (a, b) SCLC curves (for the hole-only devices) of PSCs without and with HQTh-EC.

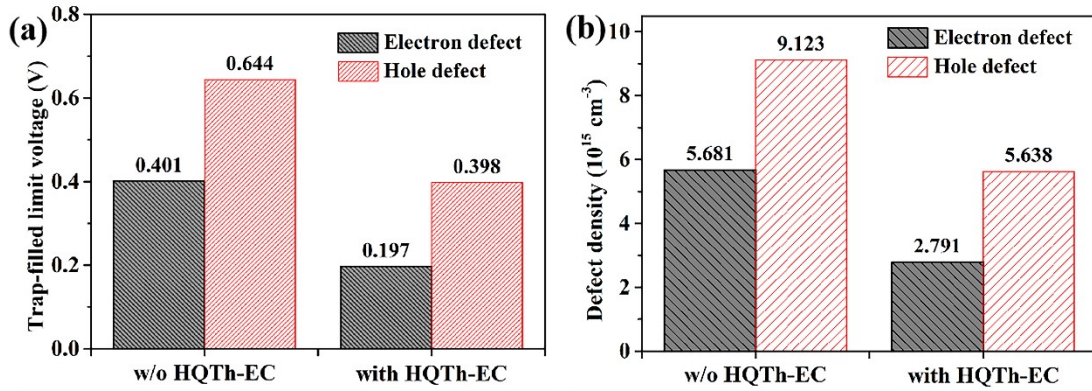

**Figure S7.** (a) Trap-filled limit voltage and (b) defect density calculated from SCLC measurements of the PSCs without and with HQTh-EC.

**Table S1.** The fitting  $R_s$  and  $R_{ct}$  results of perovskite films without and with HQTh-EC.

| Sample   | $R_s$   | $R_{ct}$ |
|----------|---------|----------|
| w/o dye  | 0.24775 | 1192     |
| with dye | 0.09225 | 1615     |
